# Supplementary material for: Natural Transformation of Campylobacter jejuni Occurs Beyond Limits of Growth
Source: PubMed Central journal article supplement (PMC3458841; doi:10.1371/journal.pone.0045467), 2012-09-26
Supplement: pone.0045467.s002.pdf [file pone.0045467.s002.pdf]

Table S1. DNA from *A. butzleri* and *H. pylori* cannot outcompete natural transformation of isogenic DNA.

| <i>C. jejuni</i> Cam <sup>R</sup> DNA <sup>a</sup> | <i>A. butzleri</i> DNA <sup>b</sup> | <i>H. pylori</i> DNA <sup>c</sup> | Cam <sup>R</sup> Transformants/ml <sup>d</sup> |
|----------------------------------------------------|-------------------------------------|-----------------------------------|------------------------------------------------|
| 20 ng                                              | -                                   | -                                 | 2.6x10 <sup>5</sup> ± 1.0x10 <sup>5</sup>      |
| 20 ng                                              | 20 ng                               | -                                 | 3.2x10 <sup>5</sup> ± 1.5x10 <sup>5</sup>      |
| 20 ng                                              | 100 ng                              | -                                 | 2.3x10 <sup>5</sup> ± 4.9x10 <sup>4</sup>      |
| 20 ng                                              | 200 ng                              | -                                 | 3.5x10 <sup>5</sup> ± 5.7x10 <sup>4</sup>      |
| 20 ng                                              | -                                   | 20 ng                             | 1.8x10 <sup>5</sup> ± 1.1x10 <sup>5</sup>      |
| 20 ng                                              | -                                   | 100 ng                            | 1.8x10 <sup>5</sup> ± 2.8x10 <sup>4</sup>      |
| 20 ng                                              | -                                   | 200 ng                            | 1.9x10 <sup>5</sup> ± 7.1x10 <sup>3</sup>      |

<sup>a</sup> Chromosomal DNA from *C. jejuni* NCTC11168  $\Delta$ *tlp1::Cam<sup>R</sup>*

<sup>b</sup> Chromosomal DNA from *A. butzleri* ATCC4916

<sup>c</sup> Chromosomal DNA from *H. pylori* ATCC700392

<sup>d</sup> Results are mean of three replicates with standard deviation.
