# Supplementary material for: Natural Transformation of Campylobacter jejuni Occurs Beyond Limits of Growth
Source: PubMed Central journal article supplement (PMC3458841; doi:10.1371/journal.pone.0045467), 2012-09-26
Supplement: pone.0045467.s003.pdf [file pone.0045467.s003.pdf]

Table S2. Natural transformation and survival of *C. jejuni* following DNA damage.

| <b>DNA damaging agent</b> | <b>Concentration /intensity</b> | <b>Transformants/CFU<sup>a</sup></b>           | <b>Recovery incubation<sup>b</sup></b> | <b>CFU/ml</b>                                |
|---------------------------|---------------------------------|------------------------------------------------|----------------------------------------|----------------------------------------------|
| Negative control (MitC)   | -                               | 2.1x10 <sup>-6</sup>                           | -                                      | 5.3x10 <sup>8</sup>                          |
| Mitomycin C               | 10 ng/ml                        | 2.9x10 <sup>-6</sup>                           | -                                      | 4.9x10 <sup>8</sup>                          |
| Mitomycin C               | 50 ng/ml                        | 1.5x10 <sup>-6</sup>                           | -                                      | 2.3x10 <sup>8</sup>                          |
| Mitomycin C               | 100 ng/ml                       | 1.6x10 <sup>-6</sup>                           | -                                      | 1.9x10 <sup>8</sup>                          |
| Mitomycin C               | 200 ng/ml                       | 3.1x10 <sup>-6</sup>                           | -                                      | 1.1x10 <sup>8</sup>                          |
| Mitomycin C               | 500 ng/ml                       | 3.4x10 <sup>-6</sup>                           | -                                      | 5.9x10 <sup>6</sup>                          |
| Negative control (UV)     | 0 J/m <sup>2</sup>              | -                                              | 2 h                                    | 9.8x10 <sup>8</sup> ±<br>3.5x10 <sup>7</sup> |
| Negative control (UV)     | 0 J/m <sup>2</sup>              | 3.0x10 <sup>-4</sup> ±<br>3.0x10 <sup>-5</sup> | 2 h<br>+ DNA                           | 9.5x10 <sup>8</sup> ±<br>2.1x10 <sup>8</sup> |
| UV                        | 10 J/m <sup>2</sup>             | -                                              | 2 h                                    | 2.3x10 <sup>8</sup> ±<br>1.1x10 <sup>7</sup> |
| UV                        | 10 J/m <sup>2</sup>             | 3.6x10 <sup>-4</sup> ±<br>3.9x10 <sup>-5</sup> | 2 h<br>+ DNA                           | 1.9x10 <sup>8</sup> ±<br>2.5x10 <sup>7</sup> |
| UV                        | 15 J/m <sup>2</sup>             | -                                              | 2 h                                    | 1.7x10 <sup>8</sup> ±<br>3.2x10 <sup>7</sup> |
|                           | 15 J/m <sup>2</sup>             | 2.0x10 <sup>-4</sup> ±<br>8.2x10 <sup>-6</sup> | 2 h<br>+ DNA                           | 1.6x10 <sup>8</sup> ±<br>3.5x10 <sup>6</sup> |

|    |                     |                                                |              |                                              |
|----|---------------------|------------------------------------------------|--------------|----------------------------------------------|
| UV | 30 J/m <sup>2</sup> | -                                              | 2 h          | 4.6x10 <sup>7</sup> ±<br>5.3x10 <sup>6</sup> |
| UV | 30 J/m <sup>2</sup> | 2.5x10 <sup>-4</sup> ±<br>5.2x10 <sup>-5</sup> | 2 h<br>+ DNA | 4.5x10 <sup>7</sup> ±<br>1.1x10 <sup>7</sup> |
| UV | 60 J/m <sup>2</sup> | -                                              | 2 h          | 4.3x10 <sup>6</sup> ±<br>0                   |
| UV | 60 J/m <sup>2</sup> | 1.4x10 <sup>-4</sup> ±<br>2.5x10 <sup>-5</sup> | 2 h<br>+ DNA | 4.5x10 <sup>6</sup> ±<br>1.8x10 <sup>6</sup> |
| UV | 80 J/m <sup>2</sup> | -                                              | 2 h          | 1.0x10 <sup>6</sup> ±<br>1.2x10 <sup>5</sup> |
| UV | 80 J/m <sup>2</sup> | 1.4x10 <sup>-4</sup> ±<br>2.4x10 <sup>-5</sup> | 2 h<br>+ DNA | 7.8x10 <sup>5</sup> ±<br>7.1x10 <sup>4</sup> |

<sup>a</sup>Cam<sup>R</sup> transformants per CFU.

<sup>b</sup>Following UV treatment, one volume of BHI and when indicated 2 µg/ml isogenic chromosomal DNA carrying a Cam<sup>R</sup> marker was added to the culture. The bacteria were allowed to recover from the UV treatment for 2 h at 37° C in a microaerobic environment before scoring transformants and CFU/ml.

Results are representative from several independent experiments.
